# Supplementary material for: Insights into the complex role of GRAS transcription factors in the arbuscular mycorrhiza symbiosis
Source: PubMed Central journal article supplement (PMC6399340; doi:10.1038/s41598-019-40214-4), 2019-03-04
Supplement: 41598_2019_40214_MOESM1_ESM.pdf [file 41598_2019_40214_MOESM1_ESM.pdf]

## **Insights into the complex role of GRAS transcription factors in the arbuscular mycorrhiza symbiosis**

Hartmann, Rico M.<sup>1</sup>; Schaepe, Sieke<sup>1</sup>; Nübel, Daniel<sup>1</sup>; Petersen, Arne C.<sup>1</sup>; Bertolini, Martina<sup>1,2</sup>; Vasilev, Jana<sup>1</sup>; Küster, Helge<sup>1,#</sup>; Hohnjec, Natalija<sup>1,#</sup>

<sup>1</sup> Unit IV-Plant Genomics, Institute of Plant Genetics, Leibniz Universität Hannover,  
Herrenhäuser Str. 2, D-30419 Hannover, Germany

<sup>2</sup> Department of Food, Environmental and Nutritional Sciences, Università degli Studi di Milano, Via  
Mangiagalli 25, 20133 Milano, Italy

# These senior authors contributed equally to the article

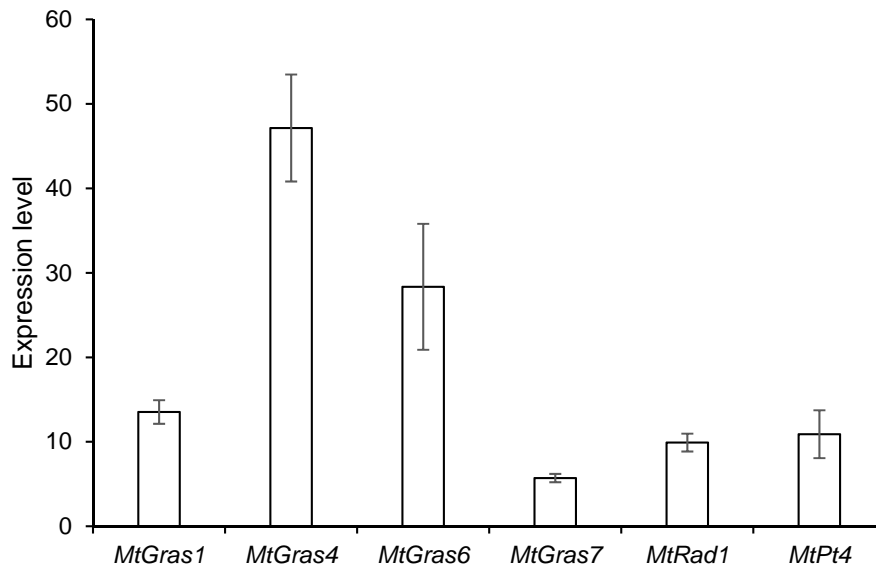

**Figure S1:** Expression level of selected *MtGras* genes, *MtRad1*, and *MtPt4* in non-mycorrhizal roots under phosphate limitation. Expression levels base on *Medicago* GeneChip hybridizations reported by Hoge Kamp *et al.* (2011) and are accessible via the *Medicago* Gene Expression Atlas (<https://mtgea.noble.org/v3/>) (Benedito *et al.*, 2008). Robust Multiarray Average (RMA) normalized expression levels of three biological replicates derived from plants grown under phosphate limiting conditions (20  $\mu$ M P) were averaged. n=3, the standard deviation is indicated.

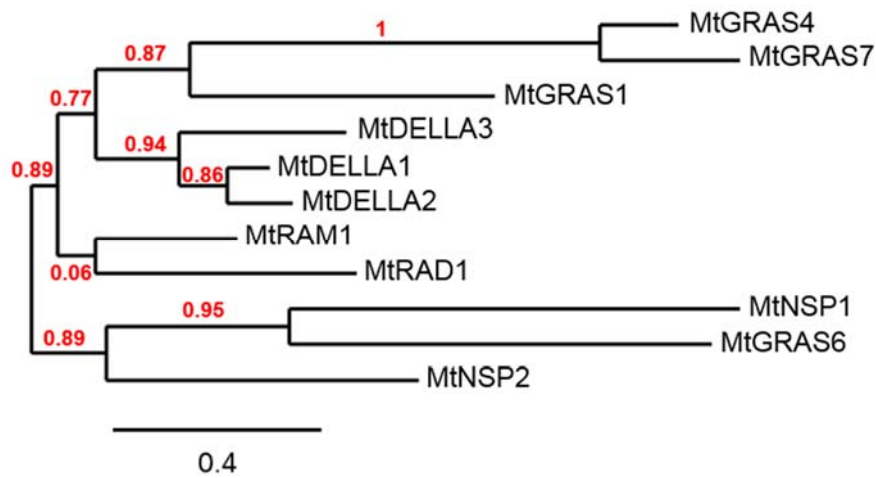

**Figure S2:** Phylogenetic analysis of selected GRAS TF sequences.

Analyses were performed on the phylogeny.fr platform (Dereeper *et al.*, 2008 and 2010). Sequences were aligned using MUSCLE (v3.8.31) (Edgar, 2004), gaps were removed by Gblocks (v0.91b) (Castresana, 2000), and trees were constructed using the maximum likelihood method in PhyML (v3.1/3.0 aLRT) (Guindon *et al.*, 2010). Bootstrap values are indicated. Except of the MtGras proteins listed in table 1, the GRAS TF sequences included MtRAM1 (Park *et al.*, 2015), MtRAD1 (Rey *et al.*, 2017), MtNSP1 (Delaux *et al.*, 2013), MtNSP2 (Maillet *et al.*, 2011), and the three MtDELLA TFs MtDELLA1, MtDELLA2, and MtDELLA3 (Floss *et al.*, 2013).

|                | Expression    |              | Promoter activity |              |
|----------------|---------------|--------------|-------------------|--------------|
|                | <i>ram1-1</i> | <i>pt4-2</i> | <i>ram1-1</i>     | <i>pt4-2</i> |
| <i>MtGras1</i> | White         | White        | White             | White        |
| <i>MtGras4</i> | Grey          | Grey         | Blue              | Blue         |
| <i>MtGras6</i> | Grey          | Grey         | Blue              | Blue         |
| <i>MtGras7</i> | White         | White        | White             | White        |
| <i>MtRad1</i>  | Grey          | Grey         | Blue              | Blue         |

**Figure S3:** Summarized data on gene expression and promoter activities of GRAS TF genes in *M. truncatula ram1-1* and *pt4-2* mutants.

Significantly reduced (white) or unaffected (grey) transcript levels after *GiTefa*-normalization (Figures 2 and 4) as well as absent (white) or still detectable (blue) promoter activities (Figures 3 and 5) in *ram1-1* and *pt4-2* roots displaying a premature arbuscule degeneration phenotype.

WT

Tnt1

sWT

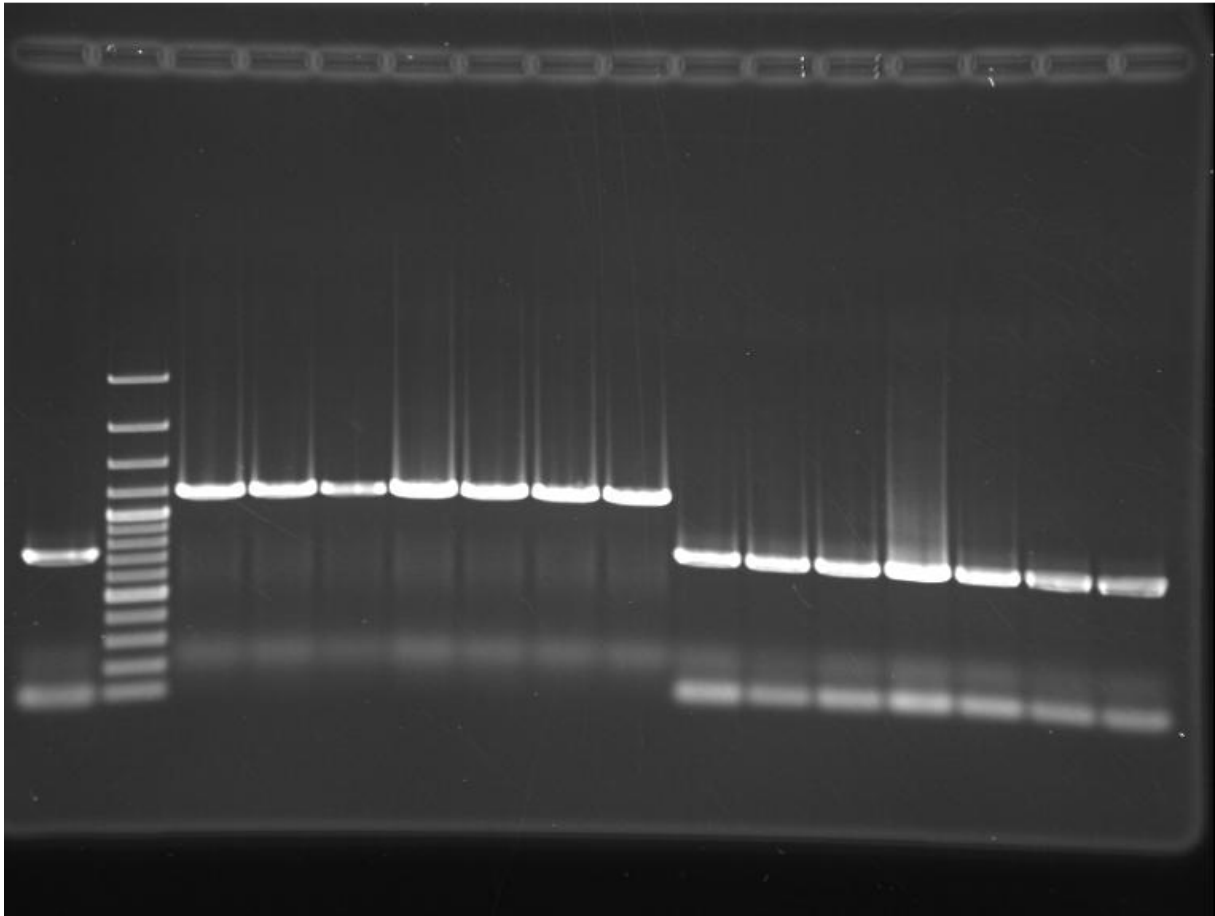

**Figure S4:** Original, uncropped image of the gel shown in Figure 6B.

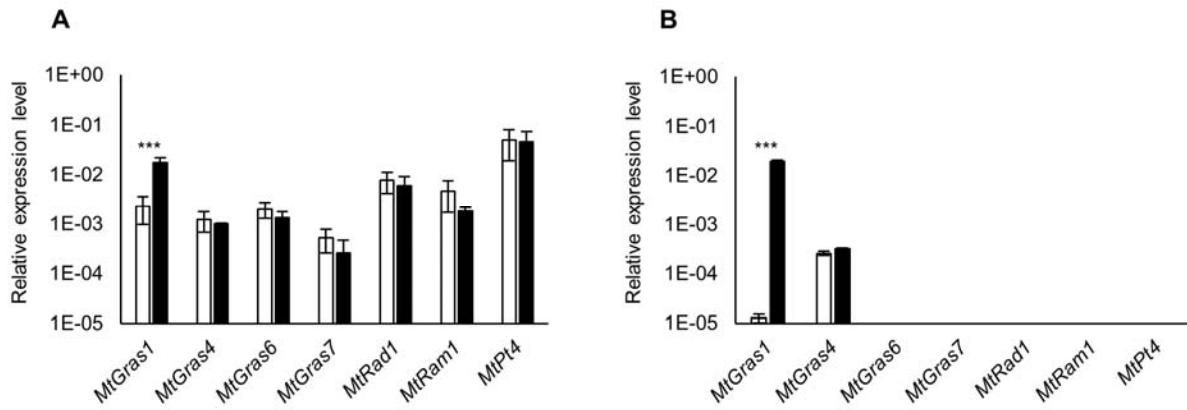

**Figure S5:** Relative expression of *MtGras1* and selected AM marker genes.

**A** Mycorrhizal (35 dpi) pPt4:*MtGras1* (black) vs. pPt4:*gusAint* (white) roots. **B** Uninoculated pUbi3:*MtGras1* (black) vs. pUbi3:*gusAint* (white) roots. Transcript amounts are shown relative to *MtTefα*. Roots were harvested at 35 days post inoculation with *R. irregularis*. n=4 biological replicates, error bars represent standard deviations.

**Supplemental Table S1**  
**Nomenclature of AM-related genes encoding GRAS TFs.**

| Gene           | Genome ID     | MtGEA ID          | GRAS subgroup           | Alternative IDs      |
|----------------|---------------|-------------------|-------------------------|----------------------|
| <i>MtGras1</i> | Medtr3g022830 | Mtr.7264.1.S1_at  | GRASM1*/SCL3**          | TF80***/MtGRAS24**   |
| <i>MtGras4</i> | Medtr7g109580 | Mtr.1484.1.S1_at  | GRASM6*/MIG1****        | MtGRAS59**           |
| <i>MtGras6</i> | Medtr2g089100 | Mtr.47463.1.S1_at | SHR**/****              | MtGRAS12**           |
| <i>MtGras7</i> | Medtr1g086970 | Mtr.24642.1.S1_at | GRASM6*/MIG1/SCR**      | MtGRAS4**            |
| <i>MtRad1</i>  | Medtr4g104020 | Mtr.36004.1.S1_at | GRASM5*/Os4****/DELLA** | MtSymSCI3/MtGRAS43** |
| <i>MtRam1</i>  | Medtr7g027190 | Not represented   | GRASM5*/DELLA**         | MtGRAS54**           |

Identifiers (IDs) in the *Medicago truncatula* genome (Tang *et al.*, 2014), the Medicago Gene Expression Atlas (MtGEA; Benedito *et al.*, 2008), as well as subgroups and alternative identifiers from the literature are listed. \*, Song *et al.* (2010); \*\*, Zhang *et al.* (2017); \*\*\*, Park *et al.* (2015); \*\*\*\*, Heck *et al.* (2016).

Supplemental Table S4

Expression of AM marker genes in mycorrhizal *M. truncatula* A17 RNAi: *MtGras1* or *ram1-1* roots in comparison to control roots.

| Transcript Cluster ID | Mt gene name     | Mt genome 4.0 ID | Annotation                                | Wild type log2 intensity | ram1-1 log2 intensity | Fold change (wild type vs. ram1-1) | p-value (wild type vs. ram1-1) | gusAint control log2 intensity | RNAi: <i>MtGras1</i> log2 intensity | Fold Change (gusAint control vs. RNAi: <i>MtGras1</i> ) | p-value (gusAint control vs. RNAi: <i>MtGras1</i> ) |
|-----------------------|------------------|------------------|-------------------------------------------|--------------------------|-----------------------|------------------------------------|--------------------------------|--------------------------------|-------------------------------------|---------------------------------------------------------|-----------------------------------------------------|
| TC0100003992.mtr.1    | <i>MtPt4</i>     | Medtr1g028600.1  | Phosphate transporter                     | 12,1                     | 2,6                   | 688,8                              | 0,000                          | 12,3                           | 11,4                                | 1,9                                                     | 0,108                                               |
| TC0400004806.mtr.1    | <i>MtGlp1</i>    | Medtr4g052770.1  | Germin-like protein                       | 10,9                     | 2,7                   | 288,6                              | 0,000                          | 11,7                           | 10,5                                | 2,3                                                     | 0,062                                               |
| TC0700001334.mtr.1    | <i>MtMyb1</i>    | Medtr7g068600.1  | Myb transcription factor                  | 10,2                     | 2,9                   | 163,4                              | 0,000                          | 8,0                            | 8,4                                 | -1,3                                                    | 0,818                                               |
| TC0500000972.mtr.1    | <i>MtLec5</i>    | Medtr5g031030.1  | Lectin                                    | 9,0                      | 2,5                   | 91,7                               | 0,000                          | 9,9                            | 7,2                                 | 6,7                                                     | 0,030                                               |
| TC0100001222.mtr.1    | <i>MtRam2</i>    | Medtr1g040500.1  | Glycerol-3-phosphate acyltransferase      | 10,3                     | 4,0                   | 78,6                               | 0,000                          | 10,3                           | 9,0                                 | 2,4                                                     | 0,099                                               |
| TC0800000282.mtr.1    | <i>MtDef2</i>    | Medtr8g012835.1  | Defensin                                  | 8,4                      | 2,3                   | 65,9                               | 0,000                          | 8,7                            | 7,3                                 | 2,7                                                     | 0,348                                               |
| TC0800004220.mtr.1    | <i>MtT1</i>      | Medtr8g059790.1  | Kunitz type trypsin inhibitor             | 8,9                      | 2,9                   | 64,1                               | 0,000                          | 8,4                            | 8,1                                 | 1,3                                                     | 0,363                                               |
| TC0500005070.mtr.1    | <i>MtGst1</i>    | Medtr5g076900.1  | Glutathione S-transferase                 | 9,5                      | 3,5                   | 62,1                               | 0,000                          | 9,9                            | 8,6                                 | 2,5                                                     | 0,096                                               |
| TC0800000278.mtr.1    | <i>MtDef1</i>    | Medtr8g012805.1  | Defensin                                  | 8,8                      | 2,9                   | 59,3                               | 0,000                          | 8,8                            | 7,0                                 | 3,3                                                     | 0,240                                               |
| TC0800002929.mtr.1    | <i>MtHa1</i>     | Medtr8g006790.1  | Plasma membrane H+ATPase                  | 9,6                      | 4,5                   | 34,9                               | 0,000                          | 10,1                           | 8,6                                 | 2,9                                                     | 0,038                                               |
| TC0800002245.mtr.1    | <i>MtNip1</i>    | Medtr8g087710.1  | Major intrinsic protein (MIP) transporter | 9,5                      | 4,5                   | 31,5                               | 0,000                          | 8,5                            | 8,3                                 | 1,1                                                     | 0,950                                               |
| TC0500003253.mtr.1    | <i>MtSbtM1</i>   | Medtr5g011320.1  | Subtilisin-like serine protease           | 9,2                      | 4,2                   | 30,8                               | 0,000                          | 10,5                           | 9,0                                 | 2,8                                                     | 0,044                                               |
| TC0500000966.mtr.1    | <i>MtStr2</i>    | Medtr5g030910.1  | ABC transporter                           | 8,9                      | 4,0                   | 29,1                               | 0,000                          | 9,6                            | 7,7                                 | 3,7                                                     | 0,059                                               |
| TC0700000122.mtr.1    | <i>MtErf1</i>    | Medtr7g009410.1  | ERF transcription factor                  | 7,6                      | 2,7                   | 28,4                               | 0,000                          | 7,7                            | 6,9                                 | 1,8                                                     | 0,109                                               |
| TC0800001689.mtr.1    | <i>MtLec7</i>    | Medtr8g068030.1  | Lectin                                    | 9,7                      | 5,3                   | 20,0                               | 0,000                          | 11,1                           | 9,4                                 | 3,2                                                     | 0,028                                               |
| TC0500004795.mtr.1    | <i>MtPt8</i>     | Medtr5g068140.1  | Phosphate transporter                     | 6,2                      | 2,2                   | 15,6                               | 0,000                          | 5,0                            | 3,2                                 | 3,4                                                     | 0,028                                               |
| TC0700005059.mtr.1    | <i>MtBcp1</i>    | Medtr7g086190.1  | Blue copper protein                       | 7,8                      | 4,6                   | 8,9                                | 0,001                          | 9,3                            | 7,7                                 | 3,0                                                     | 0,033                                               |
| TC0600000634.mtr.1    | <i>MtVapyrin</i> | Medtr6g027840.1  | Ankyrin repeat protein                    | 9,0                      | 5,9                   | 8,1                                | 0,000                          | 9,4                            | 7,7                                 | 3,1                                                     | 0,080                                               |
| TC0300005385.mtr.1    | <i>MtScp1</i>    | Medtr3g079590.1  | Serine carboxypeptidase                   | 10,6                     | 7,9                   | 6,8                                | 0,001                          | 11,8                           | 10,3                                | 2,9                                                     | 0,032                                               |
| TC0800003834.mtr.1    | <i>MtAnn2</i>    | Medtr8g038220.2  | Annexin                                   | 7,6                      | 5,2                   | 5,4                                | 0,000                          | 8,5                            | 7,2                                 | 2,5                                                     | 0,059                                               |
| TC0800003833.mtr.1    | <i>MtAnn1</i>    | Medtr8g038210.2  | Annexin                                   | 6,8                      | 4,7                   | 4,2                                | 0,000                          | 7,6                            | 7,0                                 | 1,5                                                     | 0,203                                               |
| TC0700002896.mtr.1    | <i>MtAmt1</i>    | Medtr7g115050.1  | Ammonium transporter                      | 4,8                      | 3,0                   | 3,4                                | 0,002                          | 6,4                            | 4,4                                 | 3,9                                                     | 0,022                                               |
| TC0200005086.mtr.1    | <i>MtCbf1</i>    | Medtr2g081600.1  | Nuclear transcription factor Y            | 4,6                      | 2,9                   | 3,2                                | 0,001                          | 6,4                            | 4,2                                 | 4,6                                                     | 0,119                                               |
| TC0200005087.mtr.1    | <i>MtCbf2</i>    | Medtr2g081630.1  | Nuclear transcription factor Y            | 4,8                      | 3,3                   | 2,8                                | 0,007                          | 6,6                            | 4,2                                 | 5,3                                                     | 0,160                                               |
| TC0700003611.mtr.1    | <i>MtRam1</i>    | Medtr7g027190.1  | GRAS transcription factor                 | 8,1                      | 2,7                   | 43,2                               | 0,000                          | 8,9                            | 6,9                                 | 4,2                                                     | 0,042                                               |
| TC0300003722.mtr.1    | <i>MtGras1</i>   | Medtr3g022830.1  | GRAS transcription factor                 | 6,9                      | 2,7                   | 17,4                               | 0,000                          | 6,5                            | 4,7                                 | 3,4                                                     | 0,004                                               |
| TC0400002717.mtr.1    | <i>MtRad1</i>    | Medtr4g104020.1  | GRAS transcription factor                 | 7,2                      | 4,4                   | 6,7                                | 0,001                          | 7,9                            | 4,9                                 | 8,0                                                     | 0,035                                               |
| TC0100005775.mtr.1    | <i>MtGras7</i>   | Medtr1g086970.1  | GRAS transcription factor                 | 4,6                      | 2,6                   | 3,9                                | 0,002                          | 4,2                            | 3,3                                 | 1,9                                                     | 0,044                                               |
| TC0800003959.mtr.1    | <i>MtTF124</i>   | Medtr8g442410.1  | GRAS transcription factor                 | 6,2                      | 5,4                   | 1,8                                | 0,002                          | 7,2                            | 5,4                                 | 3,5                                                     | 0,027                                               |
| TC0200002452.mtr.1    | <i>MtGras6</i>   | Medtr2g089100.1  | GRAS transcription factor                 | 5,7                      | 4,4                   | 2,6                                | 0,002                          | 6,8                            | 4,7                                 | 4,3                                                     | 0,041                                               |
| TC0700005897.mtr.1    | <i>MtGras4</i>   | Medtr7g109580.1  | GRAS transcription factor                 | 4,5                      | 3,3                   | 2,3                                | 0,004                          | 4,9                            | 4,9                                 | 1,0                                                     | 0,653                                               |



**Supplemental Table S5****Primers for cloning reporter gene, RNAi, overexpression fusions, and genotyping a *Tnt1* line.****Reporter gene fusions**

|                      |                                |
|----------------------|--------------------------------|
| pMtGras1_for         | AAAGCATGCAAGCGATGAAAGGGTGTGAA  |
| pMtGras1_rev         | AAACCCGGGGGTGATTTATCTTGAAGAATT |
| pMtGras4_for         | AAAGAATTCCTTGAACCATTATTGGATTA  |
| pMtGras4_rev         | AAAAAGCTTATGACGGATTACAAGAGAAA  |
| pMtGras6_for         | AAAGCATGCCATTGTACGTAGAGTTCTGA  |
| pMtGras6_rev         | AAAAAGCTTGGTTGAAGGAGATTGGAAAA  |
| pMtGras7_XhoI_for    | AAACTCGAGCGAATATGCAAAATTGATCC  |
| pMtGras7_HindIII_rev | AAAAGCTTGTTGTTATTGCAAAGAACTG   |
| pMtRad1_for          | AAAGAATTCTCATGAAATTGTTATACAAA  |
| pMtRad1_rev          | AAAAAGCTTTGACATATTAATTTCTCAATT |

**MtGras1 overexpression**

|                |                                  |
|----------------|----------------------------------|
| MtGras1oex_for | AAAACCCGGGGATGGATTCAGGTTCCGCATAT |
| MtGras1oex_rev | AAAACCCGGGTCACCTAAATTTCCAGGCCGA  |

**MtGras1 RNA interference**

|                |                                                   |
|----------------|---------------------------------------------------|
| RNAi_Gras1_for | GGGGACAAGTTTGTACAAAAAAGCAGGCTGCTGAGGGAATTGAGATATG |
| RNAi_Gras1_rev | GGGGACCACTTTGTACAAGAAAGCTGGGTATCAATAATATGCACCACCT |

**Tnt1 genotyping**

|               |                             |
|---------------|-----------------------------|
| NF4813_16_for | AAGTGGGGTCCAGTGCATAG        |
| NF4813_16_rev | TACATTGGAGTCCCCTTCCA        |
| Tnt1-F        | GCATTCAAAGTAGAAGACAGTGCTACC |

**Supplemental Table S6****Primers used in real-time RT-PCR experiments.**

| Primer               | NCBI accession | Sequence              |
|----------------------|----------------|-----------------------|
| MtGras1_for          | XM_003598826   | TTTAGGCCCTTACAAGATTAC |
| MtGras1_rev          |                | CTTCACTGAAATAAGTGACCA |
| MtGras1_oex_for      | XM_003598826   | TGGATGTAATTTAACGGAGAG |
| MtGras1_oex_rev      |                | CTTCACTGAAATAAGTGACCA |
| MtGras4_for          | XM_003625927   | AGGGTTAAGAAATATTGTTGC |
| MtGras4_rev          |                | TAAACACATGCCTCACTAAAC |
| MtGras4_Tnt1_3'_for  | XM_003625927   | ATAGAATGGTGGAACTAGGT  |
| MtGras4_Tnt1_3'_rev  |                | CCAAGCTGAGATTGAATACAT |
| MtGras6_for          | XM_003597004   | AAGCTTTGGTTATAAATTGCC |
| MtGras6_rev          |                | GTCCTATGTCAGATTCAAAC  |
| MtGras7_for          | XM_003591347   | AAACCATAATTCACCTTTGTT |
| MtGras7_rev          |                | CAGATAATATTGCTTCCATCA |
| MtRad1_for           | XM_003608835   | GTGAGGTAGATGAAAATCCAT |
| MtRad1_rev           |                | GGATAGTTACGGTTGATCTTT |
| MtMyb1_for           | XM_01359369    | TACTGCCAAATTTCTGTTCTA |
| MtMyb1_rev           |                | GGATTGTGTTTTAAAGGATTC |
| MtPt4_for            | AY116211       | TCGCGCGCCATGTTTGTTGT  |
| MtPt4_rev            |                | GCGAAGAAGAATGTTAGCCC  |
| GiTefa_for           | XM_003588773   | ATCCCAAATTTGTTAAGTCTG |
| GiTefa_rev           |                | ACAGCAACAGTCTGTCTCATA |
| Gi $\alpha$ -Tub_for | GW088233       | TGTCCAACCGTTTTAAAGT   |
| Gi $\alpha$ -Tub_rev |                | AAAGCACGTTTGCGTACAT   |
| MtRam1_for           | XM_003622047   | CATTACTACTCCGCAATTTTC |
| MtRam1_rev           |                | CAACAAACAACCTTTATCCTC |

### References only mentioned in the Supplementary Information

- Dereeper, A. *et al.* Phylogeny.fr: robust phylogenetic analysis for the non-specialist. *Nucleic Acids Research* **36**, W465 (2008).
- Dereeper, A. *et al.* SNIPlay: a web-based tool for detection, management and analysis of SNPs. Application to grapevine diversity projects. *BMC Bioinformatics* **12**, 134 (2011).
- Edgar, R. C. MUSCLE: multiple sequence alignment with high accuracy and high throughput. *Nucleic Acids Research* **32**, 1792-1797 (2004).
- Castresana, J. Selection of Conserved Blocks from Multiple Alignments for Their Use in Phylogenetic Analysis. *Molecular Biology and Evolution* **17**, 540-552 (2000).
- Guindon, S. *et al.* New algorithms and methods to estimate maximum-likelihood phylogenies: assessing the performance of PhyML 3.0. *Systematic Biology* **59**, 307-321 (2010).
- Delaux, P. M., Bécard, G. & Combier, J. P. NSP1 is a component of the Myc signaling pathway. *New Phytologist* **199**, 59-65 (2013).
- Maillet, F. *et al.* Fungal lipochitooligosaccharide symbiotic signals in arbuscular mycorrhiza. *Nature* **469**, 58-63 (2011).
